# Supplementary material
Source: PubMed Central journal article supplement (PMC327168)

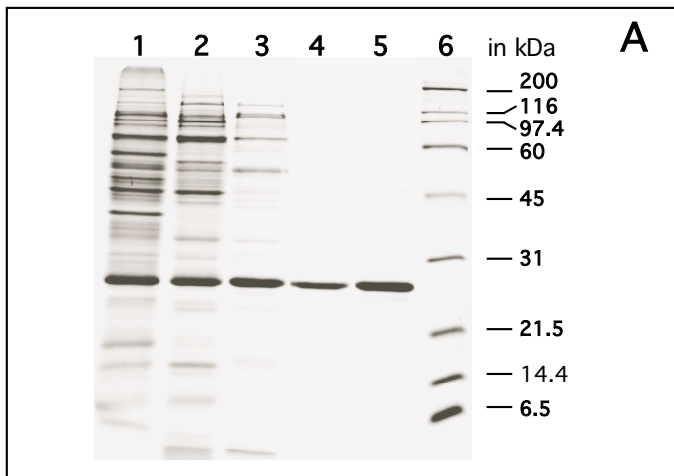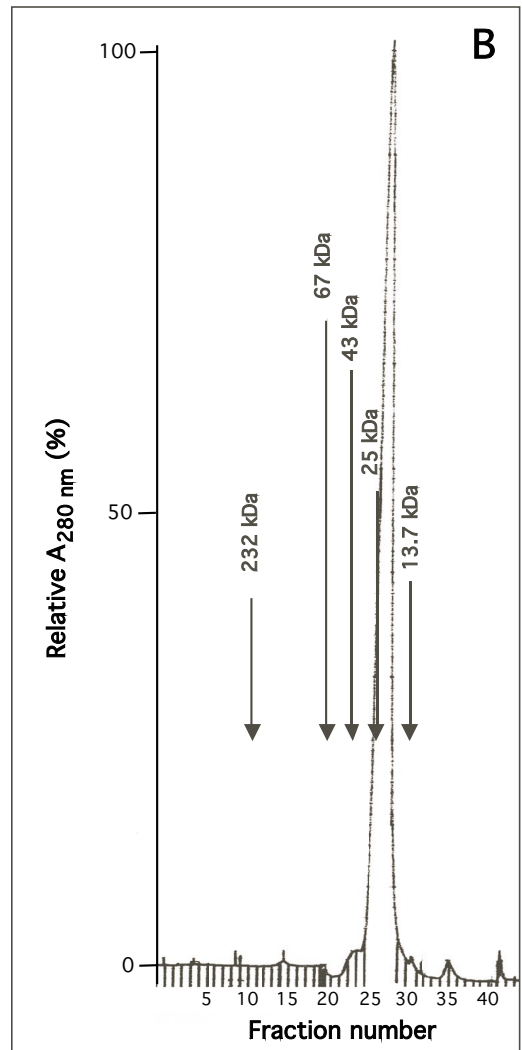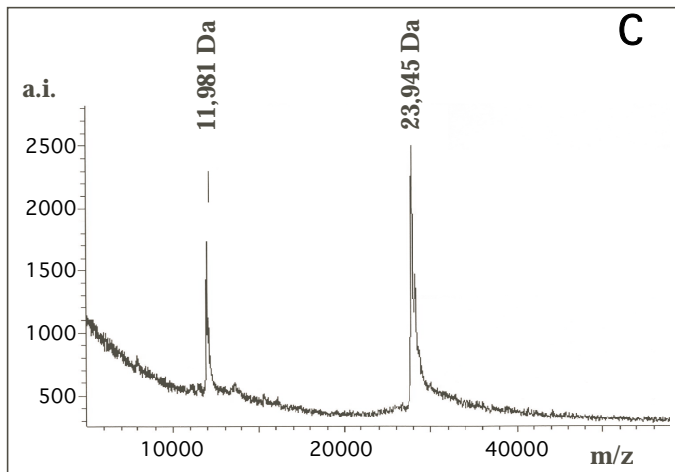

Supplement: pnas_2533829100_2.pdf [file pnas_2533829100_2.pdf]

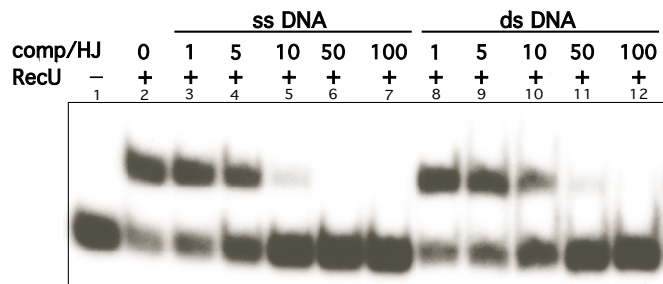

Supplement: pnas_2533829100_4.pdf [file pnas_2533829100_4.pdf]

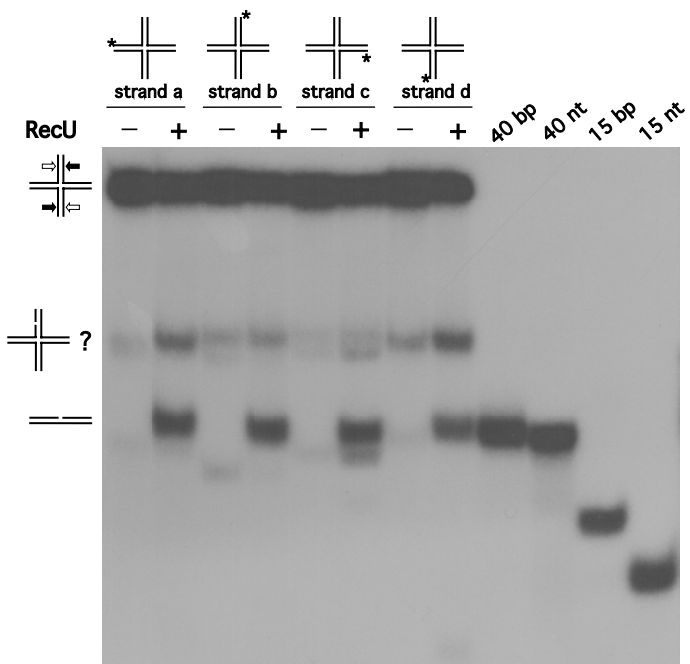

Supplement: pnas_2533829100_6.pdf [file pnas_2533829100_6.pdf]

**A**

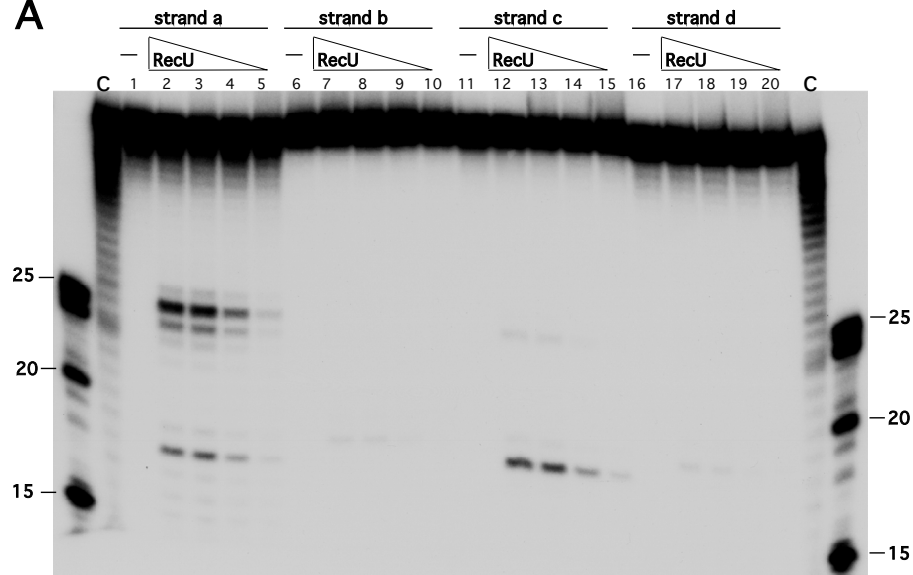

**B**

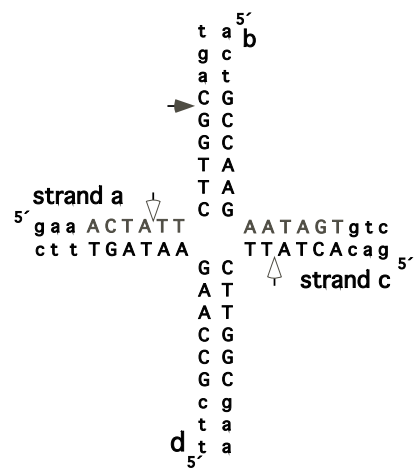

Supplement: pnas_2533829100_8.pdf [file pnas_2533829100_8.pdf]
